# Supplementary material for: Genomic stability of self-inactivating rabies
Source: eLife. 2023 Nov 3;12:e83459. doi: 10.7554/eLife.83459 (PMC10666929; doi:10.7554/eLife.83459)
Supplement: Figure 2—source data 2. [file elife-83459-fig2-data2.xlsx]

## Sheet: Sheet1
	Fig. 2C
	Replicate	puromicyn	passage	TEVp-reporter cleavage (%)		Replicate	puromicyn	passage	TEVp-reporter cleavage (%)		Replicate	puromicyn	passage	TEVp-reporter cleavage (%)		Replicate	puromicyn	passage	TEVp-reporter cleavage (%)		Replicate	puromicyn	passage	TEVp-reporter cleavage (%)
	HEK-TGG-A	-	P0	27.034		HEK-TGG-A	-	P2	6.67948		HEK-TGG-A	-	P4	5.22986		HEK-TGG-A	-	P6	1.579		HEK-TGG-A	-	P8	1.10207
	HEK-TGG-B	-	P0	34.756		HEK-TGG-B	-	P2	6.1071		HEK-TGG-B	-	P4	5.77653		HEK-TGG-B	-	P6	4.25132		HEK-TGG-B	-	P8	1.08
	HEK-TGG-C	-	P0	33.401		HEK-TGG-C	-	P2	10.3242		HEK-TGG-C	-	P4	7.34917		HEK-TGG-C	-	P6	3.43557		HEK-TGG-C	-	P8	1.82811
						HEK-TGG-A	1 ug/ml	P2	19.751		HEK-TGG-A	1 ug/ml	P4	17.514		HEK-TGG-A	1 ug/ml	P6	17.9558		HEK-TGG-A	1 ug/ml	P8	10.5148
						HEK-TGG-B	1 ug/ml	P2	18.5479		HEK-TGG-B	1 ug/ml	P4	14.2173		HEK-TGG-B	1 ug/ml	P6	12.4711		HEK-TGG-B	1 ug/ml	P8	12.4101
						HEK-TGG-C	1 ug/ml	P2	19.0081		HEK-TGG-C	1 ug/ml	P4	13.5444		HEK-TGG-C	1 ug/ml	P6	13.8057		HEK-TGG-C	1 ug/ml	P8	12.4101
						HEK-TGG-A	2 ug/ml	P2	20.0671		HEK-TGG-A	2 ug/ml	P4	15.4137		HEK-TGG-A	2 ug/ml	P6	15.5907		HEK-TGG-A	2 ug/ml	P8	13.4764
						HEK-TGG-B	2 ug/ml	P2	19.8846		HEK-TGG-B	2 ug/ml	P4	13.5337		HEK-TGG-B	2 ug/ml	P6	14.2975		HEK-TGG-B	2 ug/ml	P8	11.6995
						HEK-TGG-C	2 ug/ml	P2	19.262		HEK-TGG-C	2 ug/ml	P4	10.0552		HEK-TGG-C	2 ug/ml	P6	11.6192		HEK-TGG-C	2 ug/ml	P8	10.6204
