# Supplementary material for: Genomic stability of self-inactivating rabies
Source: eLife. 2023 Nov 3;12:e83459. doi: 10.7554/eLife.83459 (PMC10666929; doi:10.7554/eLife.83459)
Supplement: Figure 3—source data 1. [file elife-83459-fig3-data1.xlsx]

## Sheet: Sheet1
	Fig. 3D
	Animal	virus	time point	Brain area analysed	n. tdTomato+ cells		Animal	virus	time point	Brain area analysed	n. tdTomato+ cells		Animal	virus	time point	Brain area analysed	n. tdTomato+ cells
	Rosa-Tom_311.A	SiR-CRE	1 week	Hippocampus	4892		Rosa-Tom_312.A	SiR-CRE	1 month	Hippocampus	3920		Rosa-Tom_313.A	SiR-CRE	2 months	Hippocampus	4355
	Rosa-Tom_311.B	SiR-CRE	1 week	Hippocampus	3896		Rosa-Tom_312.B	SiR-CRE	1 month	Hippocampus	5092		Rosa-Tom_313.B	SiR-CRE	2 months	Hippocampus	6246
	Rosa-Tom_311.C	SiR-CRE	1 week	Hippocampus	3704		Rosa-Tom_312.C	SiR-CRE	1 month	Hippocampus	2334		Rosa-Tom_313.C	SiR-CRE	2 months	Hippocampus	4595
	Rosa-Tom_311.D	SiR-CRE	1 week	Hippocampus	3943		Rosa-Tom_312.D	SiR-CRE	1 month	Hippocampus	5696		Rosa-Tom_313.D	SiR-CRE	2 months	Hippocampus	2634
	Rosa-Tom_321.A	SiR-G453X-CRE	1 week	Hippocampus	4124		Rosa-Tom_322.A	SiR-G453X-CRE	1 month	Hippocampus	1750		Rosa-Tom_323.A	SiR-G453X-CRE	2 months	Hippocampus	1834
	Rosa-Tom_321.B	SiR-G453X-CRE	1 week	Hippocampus	2748		Rosa-Tom_322.B	SiR-G453X-CRE	1 month	Hippocampus	2224		Rosa-Tom_323.B	SiR-G453X-CRE	2 months	Hippocampus	1891
	Rosa-Tom_321.C	SiR-G453X-CRE	1 week	Hippocampus	3549		Rosa-Tom_322.C	SiR-G453X-CRE	1 month	Hippocampus	2175		Rosa-Tom_323.C	SiR-G453X-CRE	2 months	Hippocampus	2278
	Rosa-Tom_321.D	SiR-G453X-CRE	1 week	Hippocampus	1786		Rosa-Tom_322.D	SiR-G453X-CRE	1 month	Hippocampus	1734		Rosa-Tom_323.D	SiR-G453X-CRE	2 months	Hippocampus	1312
	Rosa-Tom_331.A	Rab-CRE	1 week	Hippocampus	1341		Rosa-Tom_332.A	Rab-CRE	1 month	Hippocampus	545		Rosa-Tom_333.A	Rab-CRE	2 months	Hippocampus	662
	Rosa-Tom_331.B	Rab-CRE	1 week	Hippocampus	1731		Rosa-Tom_332.B	Rab-CRE	1 month	Hippocampus	705		Rosa-Tom_333.B	Rab-CRE	2 months	Hippocampus	859
	Rosa-Tom_331.C	Rab-CRE	1 week	Hippocampus	1679		Rosa-Tom_332.C	Rab-CRE	1 month	Hippocampus	853		Rosa-Tom_333.C	Rab-CRE	2 months	Hippocampus	311
	Rosa-Tom_331.D	Rab-CRE	1 week	Hippocampus	936		Rosa-Tom_332.D	Rab-CRE	1 month	Hippocampus	490		Rosa-Tom_333.D	Rab-CRE	2 months	Hippocampus	666
