# Supplementary material for: Genomic stability of self-inactivating rabies
Source: eLife. 2023 Nov 3;12:e83459. doi: 10.7554/eLife.83459 (PMC10666929; doi:10.7554/eLife.83459)
Supplement: Figure 4—source data 1. [file elife-83459-fig4-data1.xlsx]

## Sheet: Sheet1
	Fig. 4C
	Animal	ROI	virus	time point	Brain area analysed	n. tdTomato+ cells		Animal	ROI	virus	time point	Brain area analysed	n. tdTomato+ cells		Animal	ROI	virus	time point	Brain area analysed	n. tdTomato+ cells		Animal	ROI	virus	time point	Brain area analysed	n. tdTomato+ cells		Animal	ROI	virus	time point	Brain area analysed	n. tdTomato+ cells
	Rosa-Tom_411.A	1	SiR-CRE	1 week	Cerebral Cortex	92		Rosa-Tom_411.A	1	SiR-CRE	2 weeks	Cerebral Cortex	92		Rosa-Tom_411.A	1	SiR-CRE	3 weeks	Cerebral Cortex	92		Rosa-Tom_411.A	1	SiR-CRE	4 weeks	Cerebral Cortex	92		Rosa-Tom_411.A	1	SiR-CRE	21 weeks	Cerebral Cortex	92
	Rosa-Tom_411.A	2	SiR-CRE	1 week	Cerebral Cortex	144		Rosa-Tom_411.A	2	SiR-CRE	2 weeks	Cerebral Cortex	142		Rosa-Tom_411.A	2	SiR-CRE	3 weeks	Cerebral Cortex	142		Rosa-Tom_411.A	2	SiR-CRE	4 weeks	Cerebral Cortex	140		Rosa-Tom_411.A	2	SiR-CRE	21 weeks	Cerebral Cortex	140
	Rosa-Tom_411.A	3	SiR-CRE	1 week	Cerebral Cortex	76		Rosa-Tom_411.A	3	SiR-CRE	2 weeks	Cerebral Cortex	76		Rosa-Tom_411.A	3	SiR-CRE	3 weeks	Cerebral Cortex	76		Rosa-Tom_411.A	3	SiR-CRE	4 weeks	Cerebral Cortex	75		Rosa-Tom_411.A	3	SiR-CRE	21 weeks	Cerebral Cortex	75
	Rosa-Tom_411.B	1	SiR-CRE	1 week	Cerebral Cortex	77		Rosa-Tom_411.B	1	SiR-CRE	2 weeks	Cerebral Cortex	75		Rosa-Tom_411.B	1	SiR-CRE	3 weeks	Cerebral Cortex	73		Rosa-Tom_411.B	1	SiR-CRE	4 weeks	Cerebral Cortex	73		Rosa-Tom_411.B	1	SiR-CRE	21 weeks	Cerebral Cortex	72
	Rosa-Tom_411.B	2	SiR-CRE	1 week	Cerebral Cortex	123		Rosa-Tom_411.B	2	SiR-CRE	2 weeks	Cerebral Cortex	122		Rosa-Tom_411.B	2	SiR-CRE	3 weeks	Cerebral Cortex	119		Rosa-Tom_411.B	2	SiR-CRE	4 weeks	Cerebral Cortex	121		Rosa-Tom_411.B	2	SiR-CRE	21 weeks	Cerebral Cortex	120
	Rosa-Tom_411.B	3	SiR-CRE	1 week	Cerebral Cortex	62		Rosa-Tom_411.B	3	SiR-CRE	2 weeks	Cerebral Cortex	61		Rosa-Tom_411.B	3	SiR-CRE	3 weeks	Cerebral Cortex	61		Rosa-Tom_411.B	3	SiR-CRE	4 weeks	Cerebral Cortex	61		Rosa-Tom_411.B	3	SiR-CRE	21 weeks	Cerebral Cortex	60
	Rosa-Tom_411.C	1	Rab-CRE	1 week	Cerebral Cortex	27		Rosa-Tom_411.C	1	Rab-CRE	2 weeks	Cerebral Cortex	16		Rosa-Tom_411.C	1	Rab-CRE	3 weeks	Cerebral Cortex	11		Rosa-Tom_411.C	1	Rab-CRE	4 weeks	Cerebral Cortex	10		Rosa-Tom_411.C	1	Rab-CRE	9 weeks	Cerebral Cortex	9
	Rosa-Tom_411.C	2	Rab-CRE	1 week	Cerebral Cortex	34		Rosa-Tom_411.C	2	Rab-CRE	2 weeks	Cerebral Cortex	15		Rosa-Tom_411.C	2	Rab-CRE	3 weeks	Cerebral Cortex	8		Rosa-Tom_411.C	2	Rab-CRE	4 weeks	Cerebral Cortex	8		Rosa-Tom_411.C	2	Rab-CRE	9 weeks	Cerebral Cortex	8
	Rosa-Tom_411.C	3	Rab-CRE	1 week	Cerebral Cortex	30		Rosa-Tom_411.C	3	Rab-CRE	2 weeks	Cerebral Cortex	10		Rosa-Tom_411.C	3	Rab-CRE	3 weeks	Cerebral Cortex	7		Rosa-Tom_411.C	3	Rab-CRE	4 weeks	Cerebral Cortex	7		Rosa-Tom_411.C	3	Rab-CRE	9 weeks	Cerebral Cortex	7
	Rosa-Tom_411.D	1	Rab-CRE	1 week	Cerebral Cortex	12		Rosa-Tom_411.D	1	Rab-CRE	2 weeks	Cerebral Cortex	7		Rosa-Tom_411.D	1	Rab-CRE	3 weeks	Cerebral Cortex	7		Rosa-Tom_411.D	1	Rab-CRE	4 weeks	Cerebral Cortex	5		Rosa-Tom_411.D	1	Rab-CRE	9 weeks	Cerebral Cortex	4
	Rosa-Tom_411.D	2	Rab-CRE	1 week	Cerebral Cortex	13		Rosa-Tom_411.D	2	Rab-CRE	2 weeks	Cerebral Cortex	9		Rosa-Tom_411.D	2	Rab-CRE	3 weeks	Cerebral Cortex	6		Rosa-Tom_411.D	2	Rab-CRE	4 weeks	Cerebral Cortex	4		Rosa-Tom_411.D	2	Rab-CRE	9 weeks	Cerebral Cortex	4
	Rosa-Tom_411.D	3	Rab-CRE	1 week	Cerebral Cortex	20		Rosa-Tom_411.D	3	Rab-CRE	2 weeks	Cerebral Cortex	7		Rosa-Tom_411.D	3	Rab-CRE	3 weeks	Cerebral Cortex	6		Rosa-Tom_411.D	3	Rab-CRE	4 weeks	Cerebral Cortex	6		Rosa-Tom_411.D	3	Rab-CRE	9 weeks	Cerebral Cortex	6
