# Supplementary material for: Genomic stability of self-inactivating rabies
Source: eLife. 2023 Nov 3;12:e83459. doi: 10.7554/eLife.83459 (PMC10666929; doi:10.7554/eLife.83459)
Supplement: Figure 5—source data 1. [file elife-83459-fig5-data1.xlsx]

## Sheet: Sheet1
	Fig. 5C
	Animal	AAV virus	SiR virus (EnvA)	Brain area analysed	n. tdTomato+ cells		Animal	AAV virus	SiR virus (EnvA)	Brain area analysed	n. tdTomato+ cells
	Rosa-Tom_51.A	AAV-TVA	SiR-CRE	Basolateral Amygdala	0		Rosa-Tom_53.A	AAV-TVA-G + AAV-TEVp	SiR-CRE	Basolateral Amygdala	316
	Rosa-Tom_51.B	AAV-TVA	SiR-CRE	Basolateral Amygdala	0		Rosa-Tom_53.B	AAV-TVA-G + AAV-TEVp	SiR-CRE	Basolateral Amygdala	347
	Rosa-Tom_51.C	AAV-TVA	SiR-CRE	Basolateral Amygdala	0		Rosa-Tom_53.C	AAV-TVA-G + AAV-TEVp	SiR-CRE	Basolateral Amygdala	240
	Rosa-Tom_51.D	AAV-TVA	SiR-CRE	Basolateral Amygdala	0		Rosa-Tom_53.D	AAV-TVA-G + AAV-TEVp	SiR-CRE	Basolateral Amygdala	562
	Rosa-Tom_52.A	AAV-TVA-G	SiR-CRE	Basolateral Amygdala	149		Rosa-Tom_54.A	AAV-TVA-G	SiR-G453X-CRE	Basolateral Amygdala	123
	Rosa-Tom_52.B	AAV-TVA-G	SiR-CRE	Basolateral Amygdala	155		Rosa-Tom_54.B	AAV-TVA-G	SiR-G453X-CRE	Basolateral Amygdala	294
	Rosa-Tom_52.C	AAV-TVA-G	SiR-CRE	Basolateral Amygdala	133		Rosa-Tom_54.C	AAV-TVA-G	SiR-G453X-CRE	Basolateral Amygdala	178
	Rosa-Tom_52.D	AAV-TVA-G	SiR-CRE	Basolateral Amygdala	240		Rosa-Tom_54.D	AAV-TVA-G	SiR-G453X-CRE	Basolateral Amygdala	168
	Fig. 5E
	Animal	AAV virus	SiR virus (EnvA)	Brain area analysed	n. tdTomato+ cells		Animal	AAV virus	SiR virus (EnvA)	Brain area analysed	n. tdTomato+ cells
	Rosa-Tom_55.A	AAV-TVA-G_N2c	SiR-CRE	Basolateral Amygdala	787		Rosa-Tom_57.A	AAV-TVA-G_N2c + AAV-TEVp	SiR-CRE	Basolateral Amygdala	829
	Rosa-Tom_55.B	AAV-TVA-G_N2c	SiR-CRE	Basolateral Amygdala	222		Rosa-Tom_57.B	AAV-TVA-G_N2c + AAV-TEVp	SiR-CRE	Basolateral Amygdala	872
	Rosa-Tom_55.C	AAV-TVA-G_N2c	SiR-CRE	Basolateral Amygdala	451		Rosa-Tom_57.C	AAV-TVA-G_N2c + AAV-TEVp	SiR-CRE	Basolateral Amygdala	831
	Rosa-Tom_56.A	AAV-TVA-G_N2c	SiR-N2c-CRE	Basolateral Amygdala	1592		Rosa-Tom_58.A	AAV-TVA-G_N2c + AAV-TEVp	SiR-N2c-CRE	Basolateral Amygdala	2115
	Rosa-Tom_56.A	AAV-TVA-G_N2c	SiR-N2c-CRE	Basolateral Amygdala	1914		Rosa-Tom_58.B	AAV-TVA-G_N2c + AAV-TEVp	SiR-N2c-CRE	Basolateral Amygdala	1671
	Rosa-Tom_56.A	AAV-TVA-G_N2c	SiR-N2c-CRE	Basolateral Amygdala	1568		Rosa-Tom_58.C	AAV-TVA-G_N2c + AAV-TEVp	SiR-N2c-CRE	Basolateral Amygdala	2017
